# Supplementary material for: Sodium, Potassium and Iodine Intake in an Adult Population of Lithuania
Source: MDPI journal article supplement (doi:10.3390/nu14183817), 2022-09-16
Supplement: s1 [file s1]

**„Lietuvos gyventojų natrio ir jodo būklės vertinimas ir visuomenės sveikatos politikos gairių sudarymas (NATRIJOD)“**

**DRUSKOS VARTOJIMO ĮPROČIŲ IR SVEIKATOS BŪKLĖS KLAUSIMYNAS**

Dėkojame, kad sutikote dalyvauti Lietuvos ir Pasaulio sveikatos organizacijos tyrėjų atliekamame tyrime. Maloniai prašome atidžiai perskaityti kiekvieną klausimą ir tinkamą atsakymą pažymėti kryželiu („X“), ar įrašyti žodžiu. Apklausa yra anoniminė, konfidencialumas garantuojamas, gauti duomenys bus naudojami tik apibendrintai. Jūsų atsakymai, nuomonė ir pasiūlymai yra labai svarbūs vertinant Lietuvos gyventojų kasdienes druskos vartojimo įpročius ir jų pokyčius bei teikiant rekomendacijas valstybės institucijoms ir privačiam maisto gamintojų sektoriui kaip sumažinti druskos vartojimą ir pagerinti kiekvieno gyventojo sveikatos būklę, darbingumą ir kartu visuomenės sveikatą.

|                                                                                        |                                                                                                                                                                                                     |                                |
|----------------------------------------------------------------------------------------|-----------------------------------------------------------------------------------------------------------------------------------------------------------------------------------------------------|--------------------------------|
| <b>TIRIAMOJO NUMERIS</b> <i>(pildo tyrėjas - vieta etiketei užklijuoti)</i><br>Tyrėjas |                                                                                                                                                                                                     |                                |
| <b>Bendroji informacija</b>                                                            |                                                                                                                                                                                                     |                                |
| Klausimyno pildymo data (metai/ mėnuo/diena)                                           |                                                                                                                                                                                                     |                                |
| Sutikimo forma perskaityta ir pasirašyta                                               | <input type="checkbox"/> Taip <input type="checkbox"/> Ne <i>(jei ne, dalyvauti negalima)</i>                                                                                                       |                                |
| <b>24 val. šlapimo mėginio rinkimas</b>                                                |                                                                                                                                                                                                     |                                |
| Rinkimo pradžios data (metai/mėnuo/diena)                                              |                                                                                                                                                                                                     |                                |
| Rinkimo pradžios laikas (val./min)                                                     |                                                                                                                                                                                                     |                                |
| Rinkimo pabaigos data (metai/mėnuo/diena)                                              |                                                                                                                                                                                                     |                                |
| Rinkimo pabaigos laikas (val./min)                                                     |                                                                                                                                                                                                     |                                |
| Surinkto šlapimo tūris (ml)                                                            |                                                                                                                                                                                                     |                                |
| <b>Fiziniai duomenys</b> <i>(pildo tyrėjas)</i>                                        |                                                                                                                                                                                                     |                                |
| Ūgis (cm) <i>(be batų)</i> [aparato tipas]                                             |                                                                                                                                                                                                     |                                |
| Svoris (kg) <i>(be batų, vilkint lengvus drabužius)</i> [aparato tipas]                |                                                                                                                                                                                                     |                                |
| Arterinis kraujo spaudimas (mmHg) [aparato tipas, manžetės dydis]                      | AKS 1 matavimas ...../.....<br>AKS 2 matavimas ...../.....<br>AKS 3 matavimas ...../.....                                                                                                           |                                |
| Širdies susitraukimų dažnis (pulsas) k/min                                             | ŠSD 1 matavimas .....<br>ŠSD 2 matavimas .....<br>ŠSD 3 matavimas .....                                                                                                                             |                                |
| <b>Demografinė informacija</b>                                                         |                                                                                                                                                                                                     |                                |
| 1. Jūsų lytis                                                                          | <input type="checkbox"/> Moteris                                                                                                                                                                    | <input type="checkbox"/> Vyras |
| 2. Jūsų gimimo data                                                                    |                                                                                                                                                                                                     |                                |
| 3. Gyvenamoji vieta                                                                    | <input type="checkbox"/> Kaimas <input type="checkbox"/> Miestas                                                                                                                                    |                                |
| 4. Jūsų išsilavinimas (baigti mokslai)                                                 | <input type="checkbox"/> Pagrindinis <input type="checkbox"/> Vidurinis <input type="checkbox"/> Specialusis vidurinis<br><input type="checkbox"/> Aukštesnysis (technikumas, aukštesnioji mokykla) |                                |

|                                                                               |                                                                                                                                                                                                                                                                                                                                                                                                      |
|-------------------------------------------------------------------------------|------------------------------------------------------------------------------------------------------------------------------------------------------------------------------------------------------------------------------------------------------------------------------------------------------------------------------------------------------------------------------------------------------|
|                                                                               | <input type="checkbox"/> Aukštasis koleginiis <input type="checkbox"/> Aukštasis universitetinis                                                                                                                                                                                                                                                                                                     |
| 5. Šeiminė padėtis                                                            | <input type="checkbox"/> Vedęs (ištekęjusi) arba gyvenate nesusituokęs (-usi)<br><input type="checkbox"/> Nevedęs (netekėjusi) <input type="checkbox"/> Išsiskyręs (-usi) <input type="checkbox"/> Našlys (-ė)                                                                                                                                                                                       |
| 6. Jūsų pagrindinis užsiėmimas pastaruosius 12 mėn.                           | <input type="checkbox"/> Dirbantis <input type="checkbox"/> Studentas, (-ė) <input type="checkbox"/> Bedarbis, <input type="checkbox"/> Pensininkas,(-ė) <input type="checkbox"/> Kita (įrašykite)_____                                                                                                                                                                                              |
| <b>Druskos vartojimo įpročiai</b>                                             |                                                                                                                                                                                                                                                                                                                                                                                                      |
| 7. Ar sūdate valgydami jau pagamintus patiekalus?                             | <input type="checkbox"/> Niekada<br><input type="checkbox"/> Truputį, jei maistas nepakankamai sūrus<br><input type="checkbox"/> Beveik visada, net neragaudamas<br><input type="checkbox"/> Visada                                                                                                                                                                                                  |
| 8. Kaip dažnai naudojate druską gamindami maistą namuose?                     | <input type="checkbox"/> Niekada <input type="checkbox"/> Kartais <input type="checkbox"/> Dažnai<br><input type="checkbox"/> Visada                                                                                                                                                                                                                                                                 |
| 9. Kokios rūšies druską vartojate maistui gaminti ar sūdyti?                  | <input type="checkbox"/> Joduotą druską (akmens, jūros ar kitą)<br><input type="checkbox"/> Nejoduotą akmens druską<br><input type="checkbox"/> Himalajų druską<br><input type="checkbox"/> Kita (įrašykite)_____<br><input type="checkbox"/> Nežinau                                                                                                                                                |
| 10. Kaip dažnai valgiui gaminti ar sūdyti naudojate joduotą druską?           | <input type="checkbox"/> Niekada <input type="checkbox"/> Kartais <input type="checkbox"/> Dažnai<br><input type="checkbox"/> Visada                                                                                                                                                                                                                                                                 |
| 11. Jei nenaudojate joduotos druskos, nurodykite kodėl?                       | <input type="checkbox"/> Turiu per mažai informacijos apie joduotą druską<br><input type="checkbox"/> Esu įpratęs (-usi) naudoti nejoduotą druską<br><input type="checkbox"/> Manau, kad pakankamai jodo gaunu su kitu maistu<br><input type="checkbox"/> Rinkdamasis (-i) druską, nesidomiu, ar joje yra jodo<br><input type="checkbox"/> Nežinau<br><input type="checkbox"/> Kita (įrašykite)_____ |
| 12. Ar joduotą druską laikote sandariame, užsuktame inde?                     | <input type="checkbox"/> Taip, joduotą druską laikau sandariame inde<br><input type="checkbox"/> Ne, laikau atvirai<br><input type="checkbox"/> Tokios druskos nenaudoju                                                                                                                                                                                                                             |
| 13. Kada atidarėte pastarąją joduotos druskos pakuotę?                        | <input type="checkbox"/> prieš 0–3 mėn. <input type="checkbox"/> prieš 4–6 mėn.<br><input type="checkbox"/> prieš 6 mėn. ir anksčiau <input type="checkbox"/> nežinau<br><input type="checkbox"/> joduotos druskos nevartoju                                                                                                                                                                         |
| 14. Ar naudojate jodo turinčius maisto papildus, jūros dumblius ar spiruliną? | <input type="checkbox"/> Taip <input type="checkbox"/> Ne <input type="checkbox"/> Nežinau                                                                                                                                                                                                                                                                                                           |

**15. Kuriuos maisto produktus dažniausia sūdate gamindami maistą ar valgydami namuose paruoštą maistą? Pažymėkite „X“. Jei niekada nevartojate paminėto maisto – pažymėkite „Netaikoma“**

|                       | Papildomai nesūda        | Sūda gamindamas (-a)     | Sūda jau pagamintą patiekalą | Nevartoju šio produkto   |
|-----------------------|--------------------------|--------------------------|------------------------------|--------------------------|
| Virtos bulvės         | <input type="checkbox"/> | <input type="checkbox"/> | <input type="checkbox"/>     | <input type="checkbox"/> |
| Keptos bulvės         | <input type="checkbox"/> | <input type="checkbox"/> | <input type="checkbox"/>     | <input type="checkbox"/> |
| Makaronai arba ryžiai | <input type="checkbox"/> | <input type="checkbox"/> | <input type="checkbox"/>     | <input type="checkbox"/> |
| Kepti kiaušiniai      | <input type="checkbox"/> | <input type="checkbox"/> | <input type="checkbox"/>     | <input type="checkbox"/> |
| Virti kiaušiniai      | <input type="checkbox"/> | <input type="checkbox"/> | <input type="checkbox"/>     | <input type="checkbox"/> |
| Šviežios daržovės     | <input type="checkbox"/> | <input type="checkbox"/> | <input type="checkbox"/>     | <input type="checkbox"/> |
| Virtos daržovės       | <input type="checkbox"/> | <input type="checkbox"/> | <input type="checkbox"/>     | <input type="checkbox"/> |
| Konservuotos daržovės | <input type="checkbox"/> | <input type="checkbox"/> | <input type="checkbox"/>     | <input type="checkbox"/> |

|                                                 |                          |                          |                          |                          |
|-------------------------------------------------|--------------------------|--------------------------|--------------------------|--------------------------|
| Troškintos daržovės                             | <input type="checkbox"/> | <input type="checkbox"/> | <input type="checkbox"/> | <input type="checkbox"/> |
| Žalia mėsa (pvz., kepsnys, mėsos filė)          | <input type="checkbox"/> | <input type="checkbox"/> | <input type="checkbox"/> | <input type="checkbox"/> |
| Perdirbta mėsa (pvz., šnicelis, marinuota mėsa) | <input type="checkbox"/> | <input type="checkbox"/> | <input type="checkbox"/> | <input type="checkbox"/> |
| Šviežia, šaldyta žuvis (pvz., filė)             | <input type="checkbox"/> | <input type="checkbox"/> | <input type="checkbox"/> | <input type="checkbox"/> |
| Perdirbta žuvis (pvz., žuvų piršteliai)         | <input type="checkbox"/> | <input type="checkbox"/> | <input type="checkbox"/> | <input type="checkbox"/> |

#### 16. Kaip dažnai valgote šiuos sūdytus maisto produktus?

|                                                                              | Niekada                  | Rečiau nei vieną kartą per savaitę | 1–2 kartus per savaitę   | 3–5 kartus per savaitę   | Vieną kartą per dieną    | Kelias kartus per dieną  |
|------------------------------------------------------------------------------|--------------------------|------------------------------------|--------------------------|--------------------------|--------------------------|--------------------------|
| Bulvių ar kukurūzų traškučius (čipsus)                                       | <input type="checkbox"/> | <input type="checkbox"/>           | <input type="checkbox"/> | <input type="checkbox"/> | <input type="checkbox"/> | <input type="checkbox"/> |
| Sūdytus ar skrudintus riešutus, sūdytus kukurūzų spragėsius                  | <input type="checkbox"/> | <input type="checkbox"/>           | <input type="checkbox"/> | <input type="checkbox"/> | <input type="checkbox"/> | <input type="checkbox"/> |
| Sūdytą, vytintą ar rūkytą žuvį, silkę, šprotus, žuvies konservus             | <input type="checkbox"/> | <input type="checkbox"/>           | <input type="checkbox"/> | <input type="checkbox"/> | <input type="checkbox"/> | <input type="checkbox"/> |
| Rūkytus, sūdytus ar vytintus mėsos gaminius (pvz., rūkytas dešras, kumpius)? | <input type="checkbox"/> | <input type="checkbox"/>           | <input type="checkbox"/> | <input type="checkbox"/> | <input type="checkbox"/> | <input type="checkbox"/> |
| Greitai paruošiamas užpilamas sriubas, sultinio kubelius                     | <input type="checkbox"/> | <input type="checkbox"/>           | <input type="checkbox"/> | <input type="checkbox"/> | <input type="checkbox"/> | <input type="checkbox"/> |

|                                                                                                                       |                                                                                                                                                                                                                                                                                                                                                                                                                                                                                                                                                                                                                                                                                                                                                                                                   |
|-----------------------------------------------------------------------------------------------------------------------|---------------------------------------------------------------------------------------------------------------------------------------------------------------------------------------------------------------------------------------------------------------------------------------------------------------------------------------------------------------------------------------------------------------------------------------------------------------------------------------------------------------------------------------------------------------------------------------------------------------------------------------------------------------------------------------------------------------------------------------------------------------------------------------------------|
| 17. Kaip manote, kiek druskos Jūs suvartojate?                                                                        | <input type="checkbox"/> Gerokai per daug <input type="checkbox"/> Per daug<br><input type="checkbox"/> Tinkamą kiekį<br><input type="checkbox"/> Per mažai <input type="checkbox"/> Gerokai per mažai <input type="checkbox"/> Neturiu nuomonės                                                                                                                                                                                                                                                                                                                                                                                                                                                                                                                                                  |
| 18. Kiek gramų druskos rekomenduojama suvartoti suaugusiam žmogui per parą? (pasirinkite vieną atsakymo variantą)     | <input type="checkbox"/> Iki 5 g (nepilnas arbatinis šaukštelis)<br><input type="checkbox"/> 5–10 g (iki 1 arbatinio šaukštelio su kaupu)<br><input type="checkbox"/> 10–15 g<br><input type="checkbox"/> Daugiau nei 15 g<br><input type="checkbox"/> Nežinau                                                                                                                                                                                                                                                                                                                                                                                                                                                                                                                                    |
| 19. Kaip manote, ar didelis druskos suvartojimas gali sukelti rimtų sveikatos sutrikimų?                              | <input type="checkbox"/> Taip <input type="checkbox"/> Ne <input type="checkbox"/> Nežinau                                                                                                                                                                                                                                                                                                                                                                                                                                                                                                                                                                                                                                                                                                        |
| 20. Ar imatės priemonių suvartojamam druskos kiekiui reguliuoti? (nurodykite tiek atsakymų, kiek Jums atrodo tinkama) | <input type="checkbox"/> Taip <input type="checkbox"/> Ne<br><br>Jei TAIP, kokias priemones ar būdus naudojate?:<br><input type="checkbox"/> Vartoju kiek įmanoma mažiau perdirbto maisto, pusgaminių<br><input type="checkbox"/> Renkuosi simboliu „Rakto skylutė“ pažymėtus produktus<br><input type="checkbox"/> Perskaitau maisto produktų etiketes apie druskos ar natrio kiekį juose<br><input type="checkbox"/> Valgydamas/-a papildomai druskos nededu<br><input type="checkbox"/> Perku maisto produktus, turinčius mažai druskos ar natrio (pvz., silpnai sūdytus, be druskos)<br><input type="checkbox"/> Gamindamas/-a maistą druskos nededu<br><input type="checkbox"/> Druską keičiu prieskoniais be druskos<br><input type="checkbox"/> Vengiu valgyti viešojo maitinimo įstaigose |

|                                                                                                                |                                                                                                                                                                                                                                                                                                                                                                                                                                                                                                                                                                                                                                                                                                                                                                                                                                               |
|----------------------------------------------------------------------------------------------------------------|-----------------------------------------------------------------------------------------------------------------------------------------------------------------------------------------------------------------------------------------------------------------------------------------------------------------------------------------------------------------------------------------------------------------------------------------------------------------------------------------------------------------------------------------------------------------------------------------------------------------------------------------------------------------------------------------------------------------------------------------------------------------------------------------------------------------------------------------------|
|                                                                                                                | <input type="checkbox"/> Kita<br>(išvardinkite): _____<br>–                                                                                                                                                                                                                                                                                                                                                                                                                                                                                                                                                                                                                                                                                                                                                                                   |
| 21. Kur, Jūsų nuomone, tikslinga sumažinti druskos kiekį? (nurodykite tiek atsakymų, kiek Jums atrodo tinkama) | <input type="checkbox"/> Duonoje<br><input type="checkbox"/> Padažuose (pvz., majoneze, sojos padaže)<br><input type="checkbox"/> Sūdytoje, vytintoje ar rūkytoje žuvyje, silkėje<br><input type="checkbox"/> Kulinarijos skyriuose parduodamuose keptuose mėsos ir žuvies gaminiuose (pvz., keptuose viščiukų ketvirčiuose, kiaulienos karbonaduose, kepsneliuose)<br><input type="checkbox"/> Kulinarijos skyriuose parduodamuose keptuose bulvių gaminiuose (pvz., plokštainyje, blynuose, vėdaruose)<br><input type="checkbox"/> Mėsos gaminiuose (pvz., rūkytose, virtose, vytintose dešrose, dešrelėse, kumpiuose)<br><input type="checkbox"/> Sūriuose<br><input type="checkbox"/> Parduodamose salotose ir mišrainėse<br><input type="checkbox"/> Viešojo maitinimo įstaigų patiekaluose<br><input type="checkbox"/> Neturiu nuomonės |

### Mitybos įpročiai

#### 22. Kaip dažnai valgote ne namuose gamintą maistą?

|                                                                                                                                          | Niekada                  | Rečiau nei 1 kartą per savaitę | 1–2 kartus per savaitę   | 3–5 kartus per savaitę   | Kasdien                  | Kelis kartus per dieną   |
|------------------------------------------------------------------------------------------------------------------------------------------|--------------------------|--------------------------------|--------------------------|--------------------------|--------------------------|--------------------------|
| Viešojo maitinimo įstaigose                                                                                                              | <input type="checkbox"/> | <input type="checkbox"/>       | <input type="checkbox"/> | <input type="checkbox"/> | <input type="checkbox"/> | <input type="checkbox"/> |
| Paruoštą vartoti maistą, įsigytą parduotuvėje ar viešojo maitinimo įstaigoje (pvz., sumuštiniai, salotos, kepta mėsa, vyniotiniai, pica) | <input type="checkbox"/> | <input type="checkbox"/>       | <input type="checkbox"/> | <input type="checkbox"/> | <input type="checkbox"/> | <input type="checkbox"/> |
| Parduotuvėje pirkтус pusgaminius (pvz., koldūnus, picą, marinuotą mėsą, šviežias dešreles)                                               | <input type="checkbox"/> | <input type="checkbox"/>       | <input type="checkbox"/> | <input type="checkbox"/> | <input type="checkbox"/> | <input type="checkbox"/> |
|                                                                                                                                          |                          |                                |                          |                          |                          |                          |

|                                                                 |                                               |
|-----------------------------------------------------------------|-----------------------------------------------|
| 23. Kiek vandens išgeriate per dieną?                           | Stiklinės/-ių (įprasta stiklinė 240 ml) _____ |
| 24. Kiek kitų skysčių (išskyrus vandenį) suvartojate per dieną? | Stiklinės/-ių _____                           |
| 25. Kiek arbatos ir kavos išgeriate per dieną?                  | Puodeliai _____                               |

#### 26. Kaip dažnai valgote vaisius ir daržoves (išskyrus bulves)?

|                                                                                                                                               | Nevartoju                | Rečiau nei vieną kartą per savaitę | 1–2 kartus per savaitę   | 3–5 kartus per savaitę   | 6–7 kartus per savaitę   | Kelis kartus per dieną   |
|-----------------------------------------------------------------------------------------------------------------------------------------------|--------------------------|------------------------------------|--------------------------|--------------------------|--------------------------|--------------------------|
| Kaip dažnai valgote vaisių? (pvz., bananai, slyvos, abrikosai, nektarinai, vynuogės, apelsinai, kiviai, avokadas, kriaušės, vyšnios, braškės) | <input type="checkbox"/> | <input type="checkbox"/>           | <input type="checkbox"/> | <input type="checkbox"/> | <input type="checkbox"/> | <input type="checkbox"/> |
| Kaip dažnai valgote džiovintus vaisius ir                                                                                                     |                          |                                    |                          |                          |                          |                          |

|                                                                                                                                                |                          |                          |                          |                          |                          |                          |
|------------------------------------------------------------------------------------------------------------------------------------------------|--------------------------|--------------------------|--------------------------|--------------------------|--------------------------|--------------------------|
| riešutus? (pvz., džiovintos slyvos, abrikosai, žemės riešutai, migdolai)                                                                       | <input type="checkbox"/> |
| Kaip dažnai valgate šviežių daržovių? (pvz., lapinės daržovės, morkos, kopūstai, špinatai, ropės, pomidorai, burokėliai, cukinijos)            | <input type="checkbox"/> |
| Kaip dažnai valgate virtų ar troškintų daržovių? (pvz., lapinės daržovės, morkos, kopūstai, špinatai, ropės, pomidorai, burokėliai, cukinijos) | <input type="checkbox"/> |
| Kaip dažnai valgate marinuotas ar raugintas daržoves?                                                                                          | <input type="checkbox"/> |

|                                                                                      |                                                                                                                                                             |
|--------------------------------------------------------------------------------------|-------------------------------------------------------------------------------------------------------------------------------------------------------------|
| 27. Tomis dienomis, kai vartojate vaisių, kiek porcijų vaisių suvalgote per dieną?   | Porcijų skaičius: _____<br>(1 porcija – vienas vidutinio obuolio dydžio vaisius)<br><input type="checkbox"/> Nežinau                                        |
| 28. Tomis dienomis, kai valgate daržovių, kiek porcijų daržovių suvalgote per dieną? | Porcijų skaičius: _____<br>(1 porcija šviežių daržovių atitinka vieną 240 ml stiklinę, virtų daržovių – pusę stiklinės)<br><input type="checkbox"/> Nežinau |

## 29. Kaip dažnai valgate šiuos maisto produktus?

|                                                                                           | Nevartoju                | Rečiau nei vieną kartą per savaitę | 1–2 kartus per savaitę   | 3–5 kartus per savaitę   | 6–7 kartus per savaitę   | Kelis kartus per dieną   |
|-------------------------------------------------------------------------------------------|--------------------------|------------------------------------|--------------------------|--------------------------|--------------------------|--------------------------|
| Pienas                                                                                    | <input type="checkbox"/> | <input type="checkbox"/>           | <input type="checkbox"/> | <input type="checkbox"/> | <input type="checkbox"/> | <input type="checkbox"/> |
| Sūris (pvz., pelėsinis, lydytas, rūkytas, fermentinis)                                    | <input type="checkbox"/> | <input type="checkbox"/>           | <input type="checkbox"/> | <input type="checkbox"/> | <input type="checkbox"/> | <input type="checkbox"/> |
| Žuvis ar jūros gėrybės                                                                    | <input type="checkbox"/> | <input type="checkbox"/>           | <input type="checkbox"/> | <input type="checkbox"/> | <input type="checkbox"/> | <input type="checkbox"/> |
| Mėsa                                                                                      | <input type="checkbox"/> | <input type="checkbox"/>           | <input type="checkbox"/> | <input type="checkbox"/> | <input type="checkbox"/> | <input type="checkbox"/> |
| Duona (juoda, balta), batonas                                                             | <input type="checkbox"/> | <input type="checkbox"/>           | <input type="checkbox"/> | <input type="checkbox"/> | <input type="checkbox"/> | <input type="checkbox"/> |
| Sūrokas natūralus mineralinis ar šaltinio vanduo, (pvz., „Vytautas“, „Darida“, „Borjomi“) | <input type="checkbox"/> | <input type="checkbox"/>           | <input type="checkbox"/> | <input type="checkbox"/> | <input type="checkbox"/> | <input type="checkbox"/> |

|                                                                                                                                                                                    |                                                                                                                                                                                                                                              |
|------------------------------------------------------------------------------------------------------------------------------------------------------------------------------------|----------------------------------------------------------------------------------------------------------------------------------------------------------------------------------------------------------------------------------------------|
| 30. Kiek duonos riekių ar duonos pakaitalų vidutiniškai suvalgote per dieną? (pvz., duonos pakaitalai - džiovėsiai, krekeriai, duonos trapučiai arba traškučiai, bet ne dribsniai) | Juodos duonos riekių skaičius (vnt.) _____<br>Baltos duonos riekių skaičius (vnt.) _____<br>Batono riekių skaičius (vnt.) _____<br>Duonos pakaitalų riekių skaičius (vnt.) _____                                                             |
| 31. Ar valgate namuose keptą duoną?                                                                                                                                                | <input type="checkbox"/> Taip <input type="checkbox"/> Ne<br>Jei TAIP, ar jai kepti naudojate joduotą druską<br><input type="checkbox"/> Taip, naudoju joduotą druską <input type="checkbox"/> Nenaudoju<br><input type="checkbox"/> Nežinau |
| <b>Sveikatos būklė</b>                                                                                                                                                             |                                                                                                                                                                                                                                              |

## 32. Nurodykite ligas, kuriomis šiuo metu sergate ar esate persirgęs ir jų diagnozę patvirtino gydytojas ar kitas sveikatos priežiūros darbuotojas?

|  | Sergu ar esu persirgęs šiomis ligomis | Nesergu/ nesirgau | Susirgau per pastaruosius 12 mėn. | Sergu / ar persirgau seniau nei 1 m. |
|--|---------------------------------------|-------------------|-----------------------------------|--------------------------------------|
|--|---------------------------------------|-------------------|-----------------------------------|--------------------------------------|

|                                                                                              |                          |                          |                          |                          |
|----------------------------------------------------------------------------------------------|--------------------------|--------------------------|--------------------------|--------------------------|
| Padidėjęs kraujospūdis (arterinė hipertenzija)                                               | <input type="checkbox"/> | <input type="checkbox"/> | <input type="checkbox"/> | <input type="checkbox"/> |
| Miokardo infarktas                                                                           | <input type="checkbox"/> | <input type="checkbox"/> | <input type="checkbox"/> | <input type="checkbox"/> |
| Sutrikęs širdies ritmas (prieširdžių virpėjimas)                                             | <input type="checkbox"/> | <input type="checkbox"/> | <input type="checkbox"/> | <input type="checkbox"/> |
| Širdies nepakankamumas                                                                       | <input type="checkbox"/> | <input type="checkbox"/> | <input type="checkbox"/> | <input type="checkbox"/> |
| Ūminis galvos smegenų kraujotakos sutrikimas (insultas)                                      | <input type="checkbox"/> | <input type="checkbox"/> | <input type="checkbox"/> | <input type="checkbox"/> |
| Inkstų ligos                                                                                 | <input type="checkbox"/> | <input type="checkbox"/> | <input type="checkbox"/> | <input type="checkbox"/> |
| Cukrinis diabetas                                                                            | <input type="checkbox"/> | <input type="checkbox"/> | <input type="checkbox"/> | <input type="checkbox"/> |
| Skydliaukės veiklos sutrikimas (hipotireozė, hipertireozė), dėl kurių reikia vartoti vaistus | <input type="checkbox"/> | <input type="checkbox"/> | <input type="checkbox"/> | <input type="checkbox"/> |
| Kita (nurodykite)                                                                            | <input type="checkbox"/> | <input type="checkbox"/> | <input type="checkbox"/> | <input type="checkbox"/> |

|                                                                                                                                                                                                                                                                                                                                       |                                                                                                                                                                                                                                                                                                                                                                                                                                                                                                                                  |                                                                                                                                                                                                                                                                                                                          |
|---------------------------------------------------------------------------------------------------------------------------------------------------------------------------------------------------------------------------------------------------------------------------------------------------------------------------------------|----------------------------------------------------------------------------------------------------------------------------------------------------------------------------------------------------------------------------------------------------------------------------------------------------------------------------------------------------------------------------------------------------------------------------------------------------------------------------------------------------------------------------------|--------------------------------------------------------------------------------------------------------------------------------------------------------------------------------------------------------------------------------------------------------------------------------------------------------------------------|
| 33. Ar vartojate vaistus širdies ritmo sutrikimui gydyti?                                                                                                                                                                                                                                                                             |                                                                                                                                                                                                                                                                                                                                                                                                                                                                                                                                  | <input type="checkbox"/> Taip <input type="checkbox"/> Ne<br>Jei TAIP, kokius vaistus vartojate:<br><input type="checkbox"/> kordaroną <input type="checkbox"/> ritmonormą<br><input type="checkbox"/> kita (įrašykite) _____                                                                                            |
| 34. Ar pastarąsias 7 dienas vartojote vaistus skydliaukės ligai gydyti?                                                                                                                                                                                                                                                               |                                                                                                                                                                                                                                                                                                                                                                                                                                                                                                                                  | <input type="checkbox"/> Taip <input type="checkbox"/> Ne<br>Jei TAIP – kokius vaistus vartojate?<br><input type="checkbox"/> L-tiroksiną <input type="checkbox"/> metizolį, tirozolį ar propicilį<br><input type="checkbox"/> Kita (nurodykite pavadinimus) _____                                                       |
| 35. Ar per pastarąsias 7 dienas vartojote kokius nors receptinius ar nereceptinius vaistus, vaistų (tinktūras) gerklės skausmui mažinti ar atsikosėjimui gerinti, maisto papildus (pvz., mineralines medžiagas, amino rūgščių preparatus, vitaminus)?                                                                                 |                                                                                                                                                                                                                                                                                                                                                                                                                                                                                                                                  | <input type="checkbox"/> Taip <input type="checkbox"/> Ne<br>Jei TAIP, užrašykite pilną pavadinimą (-us), nurodytą (-us) ant pakuotės ir kokį kiekį (pvz., tablečių skaičių) vartojate per dieną?                                                                                                                        |
| <b>Tik MOTERIMS</b>                                                                                                                                                                                                                                                                                                                   | <input type="checkbox"/> Taip <input type="checkbox"/> Ne<br>36. Ar šiuo metu laukiatės? Jei laukiatės – kelinta nėštumo savaitė?<br>Ar laukiatės dvynukų ar trynukų? <input type="checkbox"/> Taip <input type="checkbox"/> Ne<br>Ar pastojote natūraliai <input type="checkbox"/> Taip <input type="checkbox"/> Ne<br>Ar buvo daryta stimuliacija <input type="checkbox"/> Taip <input type="checkbox"/> Ne<br>Ar buvo taikyta dirbtinio apvaisinimo procedūra <input type="checkbox"/> Taip <input type="checkbox"/> Ne _____ |                                                                                                                                                                                                                                                                                                                          |
| <b>Kiti klausimai</b>                                                                                                                                                                                                                                                                                                                 |                                                                                                                                                                                                                                                                                                                                                                                                                                                                                                                                  |                                                                                                                                                                                                                                                                                                                          |
| 37. Kiek kartų per savaitę mažiausiai 30 min. užsiimate energinga fizine veikla (mankštinatės, sportuojate, bėgiojate, greitai einate, važiuojate dviračiu, energingai dirbate namų ūkio darbus ir pan.) taip, kad pagreitėtų kvėpavimas ir pulsas? (30 min. trukmė vienos paros metu gali susidėti iš kelių dalių, pvz., 15+15 min.) |                                                                                                                                                                                                                                                                                                                                                                                                                                                                                                                                  | <input type="checkbox"/> Neužsiimu tokia fizine veikla<br><input type="checkbox"/> 1 dieną<br><input type="checkbox"/> 2 dienas<br><input type="checkbox"/> 3 dienas<br><input type="checkbox"/> 4 dienas<br><input type="checkbox"/> 5 dienas<br><input type="checkbox"/> 6 dienas<br><input type="checkbox"/> 7 dienas |

|                                                                             |                                                                                                                                                                                                               |
|-----------------------------------------------------------------------------|---------------------------------------------------------------------------------------------------------------------------------------------------------------------------------------------------------------|
| 38. Ar per dieną surūkote nors vieną ar daugiau cigarečių/ cigarų / pypkių? | <input type="checkbox"/> Ne, aš niekada nerūkiu<br><input type="checkbox"/> Ne, tačiau rūkiu praeityje<br><input type="checkbox"/> Taip, rūkau paprastas<br><input type="checkbox"/> Taip, rūkau elektronines |
|-----------------------------------------------------------------------------|---------------------------------------------------------------------------------------------------------------------------------------------------------------------------------------------------------------|

Nuoširdžiai dėkojame už Jūsų skirtą laiką, atsakymus ir kantrybę pildant klausimyną. Tikime, kad dalyvavimas šiame tyrime padės geriau suprasti savo druskos vartojimo įpročius ir atkreipti dėmesį į galimus rizikos veiksnius ir svarbius savirūpos klausimus.

Prašome kartu su užpildytu klausimynu atnešti šlapimo, surinkto pagal pateiktas rekomendacijas, indą

Linkime sveikatos!
